# Supplementary material for: Most Trial Eligibility Criteria and Patient Baseline Characteristics Do Not Modify Treatment Effect in Trials Using Targeted Therapies for Rheumatoid Arthritis: A Meta-Epidemiological Study
Source: PubMed Central journal article supplement (PMC4567072; doi:10.1371/journal.pone.0136982), 2015-09-11
Supplement: pone.0136982.s005.pdf [file pone.0136982.s005.pdf]

## Trial eligibility criteria and patient baseline characteristics

**S4 Table:** Dataset

Data on all eligible trials. ID number corresponds to reference number.(1-50)(51-62).

| ID number                                     | 1         | 2         | 3         |
|-----------------------------------------------|-----------|-----------|-----------|
| Name of Biological Agent                      | ABA       | ABA       | ABA       |
| Name of Co-allocation                         | PLA       | PLA       | MTX       |
| DMARD History                                 | TT IR     | DMARD IR  | DMARD IR  |
| csDMARD Handling at Randomisation             | CON       | DIS       | DIS       |
| MTX Handling at Randomisation                 | CON       | DIS       | CON       |
| TT Handling at Randomisation                  | DIS       | DIS       | NR        |
| Max Disease Duration                          | NR        | ES        | NR        |
| Min 66 SJC                                    | 10        | 10        | 10        |
| Min 68 TJC                                    | 12        | 12        | 12        |
| Min CRP                                       | 10 mg/mL< | NR        | 10 mg/mL< |
| Min ESR                                       | NR        | 28        | NR        |
| RF status of all trial patients               | Mix       | Mix       | Mix       |
| Baseline female percentage                    | 78.0      | 75.0      | 79.1      |
| Baseline age                                  | 53.2      | 49.9      | 51.1      |
| Baseline RF percentage                        | 73.2      | 80.7*     | 80.7      |
| Baseline anti-CCP percentage                  | NR        | NR        | NR        |
| Baseline DAS28                                | 6.5       | 7.0#      | 6.4       |
| Baseline CRP                                  | 44.0      | 32.0      | 31.3      |
| Baseline ESR                                  | NR        | 32.8      | NR        |
| Baseline 66 SJC                               | 22.4      | 23.7      | 21.6      |
| Baseline 68 TJC                               | 31.7      | 30.8      | 31.4      |
| Baseline RA duration                          | 11.9      | 3.3       | 8.6       |
| Baseline MD global (VAS)                      | 68.3      | 73.2      | 67.8      |
| Baseline PT global (VAS)                      | 69.4      | 72.2      | 62.7      |
| Baseline pain (VAS)                           | 70.5      | 70.2      | 64.2      |
| Baseline HAQ                                  | 1.8       | 1.5*      | 1.7       |
| n, randomised in active arm                   | 262       | 32        | 433       |
| n, randomised in control arm                  | 131       | 32        | 219       |
| Outcome week                                  | 24        | 12        | 26        |
| Active arm: n, achieving ACR20                | 129       | 17        | 288       |
| Active arm: total in ACR20 analysis           | 256       | 32        | 424       |
| Active arm: n, achieving DAS28-remission      | 26        | NR        | 63        |
| Active arm: total in DAS28-remission analysis | 256       | NR        | 424       |
| Control arm: n, achieving ACR20               | 26        | 10        | 85        |
| Control arm: total in ACR20 analysis          | 133       | 32        | 214       |
| Control arm: n, achieving DAS28-remission     | 1         | NR        | 6         |
| Control : total in DAS28-remission analysis   | 133       | NR        | 214       |
| Risk of Bias§                                 | L/L/L/L/L | L/L/L/L/L | L/L/L/L/L |

## Trial eligibility criteria and patient baseline characteristics

| 10        | 9                | 8         | 7         | 6         | 5           | 4         |
|-----------|------------------|-----------|-----------|-----------|-------------|-----------|
| TOC       | ABA              | ABA       | TOC       | TOC       | TOC         | TOC       |
| MTX       | MTX              | MTX       | MTX       | PLA       | MTX         | MTX       |
| TT IR     | DMARD IR         | DMARD IR  | DMARD IR  | DMARD IR  | DMARD IR    | DMARD IR  |
| DIS       | DIS              | DIS       | DIS       | CON       | DIS         | DIS       |
| CON       | CON              | CON       | CON       | CON       | CON         | CON       |
| DIS       | DIS              | NAIVE     | DIS       | NU        | DIS         | DIS       |
| NR        | NR               | NR        | NR        | NR        | NR          | NR        |
| 6         | 10               | 10        | 6         | 6         | 6           | 10        |
| 8         | 12               | 12        | 8         | 8         | 8           | 10        |
| 10 mg/mL< | 10 mg/mL<        | 10 mg/mL< | 10 mg/mL< | 10 mg/mL< | 10 mg/mL<   | 10 mg/mL< |
| 28        | NR               | NR        | 28        | 28        | 28          | 28        |
| Mix       | Mix              | Mix       | Mix       | Mix       | Mix         | Mix       |
| 81.6      | 70.4             | 85.0      | 81.5      | 82.0      | 82.5        | 77.0      |
| 53.7      | 55.2             | 49.2      | 50.7      | 53.3      | 52.4        | 50.5      |
| 77.1      | 94.4             | 86.3      | 77.0      | 80.7*     | 82.5        | 87.9      |
| NR        | NR               | NR        | NR        | NR        | NR          | NR        |
| 6.8       | 6.5 <sup>a</sup> | 6.9       | 6.8       | 6.7       | 6.6         | 6.5       |
| 32.3      | 30.5             | 29.3      | 25.0      | 26.0      | 22.5        | 28.0      |
| 51.7      | NR               | 48.4      | 50.5      | 48.5      | 46.4        | 41.0      |
| 18.9      | 21.6             | 20.8      | 20.1      | 19.4      | 17.0        | 16.7      |
| 31.1      | 30.0             | 31.1      | 32.3      | 29.8      | 28.6        | 23.8      |
| 12.0      | 9.3              | 8.1       | 7.6       | 6.9       | 9.2         | 10.9      |
| 66.9      | 62.7             | 63.6*     | 63.9      | 63.7      | 62.9        | 63.6      |
| 70.5      | 59.8             | 63.3*     | 64.2      | 66.0      | 62.9        | 65.4      |
| 64.4      | 63.3             | 60.2*     | 58.6      | 58.3      | 55.5        | 60.4      |
| 1.7       | 1.0              | 1.8       | 1.6       | 1.5       | 1.5         | 1.5*      |
| 175       | 115              | 156       | 205       | 805       | 399         | 50        |
| 160       | 119              | 110       | 204       | 415       | 392         | 49        |
| 24        | 26               | 28        | 24        | 24        | 24          | 16        |
| 85        | 69               | 104       | 120       | 488       | 224         | 36        |
| 170       | 115              | 156       | 205       | 803       | 398         | 49        |
| 40        | NR               | 18        | 47        | 241       | 105         | 17        |
| 132       | NR               | 156       | 171       | 803       | 315         | 49        |
| 16        | 42               | 46        | 54        | 101       | 106         | 20        |
| 158       | 119              | 110       | 204       | 413       | 393         | 49        |
| 1         | NR               | 3         | 2         | 24        | 8           | 4         |
| 64        | NR               | 110       | 121       | 413       | 212         | 49        |
| L/L/L/L/L | L/L/L/L/L        | L/L/L/L/L | L/L/L/L/L | L/L/L/L/L | L/L/L/L/U/L | L/L/L/L/L |

## Trial eligibility criteria and patient baseline characteristics

|             |           |           |              |           |                  |                  |
|-------------|-----------|-----------|--------------|-----------|------------------|------------------|
| 17          | 16        | 15        | 14           | 13        | 12               | 11               |
| ETA         | RIT       | RIT       | RIT          | RIT       | INF              | INF              |
| MTX         | MTX       | MTX       | MTX          | MTX       | MTX              | MTX              |
| DMARD naïve | DMARD IR  | DMARD IR  | DMARD IR     | TT IR     | DMARD naïve      | DMARD IR         |
| NU          | DIS       | NU        | DIS          | DIS       | NAIVE            | NU               |
| NU          | CON       | CON       | CON          | CON       | NAIVE            | CON              |
| NAIVE       | DIS       | NR        | NAIVE        | DIS       | NAIVE            | NAIVE            |
| ES          | NR        | NR        | NR           | NR        | EA               | NR               |
| 10          | 8         | 8         | 8            | 8         | 6*               | 6                |
| 12          | 8         | 8         | 8            | 8         | 8*               | 6                |
| 20 mg/mL<   | 15 mg/mL< | 15 mg/mL< | 4.5-7 mg/mL< | 15 mg/mL< | 20 mg/mL<        | 20 mg/mL<        |
| 28          | 28        | 28        | 28           | 28        | NR               | 28               |
| Mix         | Pos       | Pos       | Mix          | Mix       | Mix              | Mix              |
| 76.5        | 80.0      | 77.5      | 83.4         | 81.0      | 81*              | 80.5             |
| 52.8        | 51.1      | 54.0      | 51.7         | 52.4      | 52.2             | 53.5             |
| 73.5        | 100.0     | 100.0     | 74.3         | 79.0      | 65.0             | 80.5             |
| NR          | NR        | NR        | NR           | NR        | NR               | NR               |
| 5.5         | 6.8       | 6.9       | 6.5          | 6.9       | 6.6 <sup>†</sup> | 6.4 <sup>†</sup> |
| 27.8        | 31.5      | 30.5      | 24*          | 37.4      | 42.0             | 30.5             |
| NR          | 40.5      | 52.5      | NR           | 48.2      | NR               | NR               |
| 22.4        | 21.5      | 21.0      | 20.2         | 23.2      | 19.2*            | 19.0             |
| 33.7        | 33.5      | 32.0      | 29.5         | 33.5      | 28.3*            | 28.0             |
| 6.8         | 10.1      | 11.5      | 7.0          | 11.9      | 8.7*             | 8.7              |
| 63.6*       | 63.6*     | 63.6*     | 63.6*        | 63.6*     | 63.6*            | 63.0             |
| 63.3*       | 63.3*     | 63.3*     | 63.3*        | 63.3*     | 63.3*            | 64.0             |
| 60.2*       | 60.2*     | 60.2*     | 60.2*        | 60.2*     | 60.2*            | 66.5             |
| 1.5*        | 1.5*      | 1.5*      | 1.5*         | 1.9       | 1.3              | 1.8              |
| 229         | 128       | 40        | 172          | 311       | 10               | 86               |
| 229         | 128       | 40        | 172          | 209       | 10               | 88               |
| 24          | 24        | 24        | 24           | 24        | 14               | 30               |
| 187         | 66        | 29        | 86           | 152       | 6                | 42               |
| 231         | 122       | 40        | 170          | 298       | 10               | 83               |
| 62          | NR        | NR        | 16           | 45        | NR               | NR               |
| 205         | NR        | NR        | 170          | 298       | NR               | NR               |
| 166         | 34        | 15        | 40           | 36        | 2                | 17               |
| 228         | 122       | 40        | 172          | 201       | 10               | 84               |
| 26          | NR        | NR        | 4            | 4         | NR               | NR               |
| 193         | NR        | NR        | 172          | 201       | NR               | NR               |
| L/L/L/L/L   | L/L/L/L/L | L/L/L/L/L | L/L/L/L/L    | L/L/L/L/L | U/L/L/H/L        | L/L/L/L/L        |

## Trial eligibility criteria and patient baseline characteristics

|             |             |             |                  |                  |                  |             |
|-------------|-------------|-------------|------------------|------------------|------------------|-------------|
| 24          | 23          | 22          | 21               | 20               | 19               | 18          |
| GOL         | ETA         | ADA         | ADA              | ADA              | ADA              | ETA         |
| MTX         | PLA         | PLA         | MTX              | MTX              | PLA              | MTX         |
| DMARD naive | DMARD IR    | DMARD IR    | DMARD IR         | DMARD IR         | DMARD IR         | DMARD IR    |
| NU          | DIS         | DIS         | DIS              | DIS              | CON              | DIS         |
| NAIVE       | DIS         | DIS         | CON              | CON              | CON              | CON         |
| NAIVE       | NR          | NU          | NAIVE            | NAIVE            | NR               | NR          |
| NR          | NR          | NR          | NR               | NR               | NR               | NR          |
| 4           | 10          | 10          | 6                | 6                | 6                | 6           |
| 4           | 12          | 12          | 9                | 9                | 9                | 6           |
| 15 mg/mL<   | 20 mg/mL<   | 20 mg/mL<   | NR               | 10 mg/mL<        | NR               | NR          |
| 28          | 28          | 28          | NR               | NR               | NR               | NR          |
| Mix         | Mix         | Mix         | Mix              | Mix              | Mix              | Mix         |
| 84.3        | 75.0        | 78.5        | 78.3             | 74.7             | 79.4             | 84.3        |
| 49.7        | 52.0        | 53.1        | 56.6             | 51.2             | 55.4             | 49.7        |
| 80.7*       | 79.0        | 80.7        | 80.7*            | 85.5             | 62.9             | 86.0        |
| NR          | NR          | NR          | NR               | NR               | NR               | NR          |
| 6.2         | 7.2#        | 7.1         | 6.3 <sup>‡</sup> | 6.1 <sup>‡</sup> | 6.1 <sup>‡</sup> | 6.6#        |
| 25.0        | 44.0        | 54.8        | 25.8             | 18.0             | 15.0             | 23.3        |
| NR          | 37.0        | 55.9        | NR               | NR               | NR               | 28.7        |
| 15.4        | 25.0        | 20.2        | 17.1             | 19.2             | 21.1             | 19.0        |
| 28.2        | 34.0        | 34.6        | 28.3             | 27.7             | 27.5             | 28.0        |
| 3.2         | 11.5        | 11.1        | 11.7             | 11.0             | 10.4             | 13.0        |
| 61.0        | 69.0        | 67.7        | 58.8             | 61.7             | 59.8             | 61.7        |
| 6.0         | 69.5        | 72.2        | 57.4             | 53.5             | 53.4             | 60.0        |
| 6.3         | 66.0        | 70.1        | 55.0             | 56.1             | 55.4             | 52.0        |
| 1.5         | 1.7         | 1.9         | 1.6              | 1.5              | 1.4              | 1.5         |
| 159         | 81          | 113         | 67               | 207              | 318              | 59          |
| 160         | 83          | 110         | 62               | 200              | 318              | 30          |
| 24          | 13          | 26          | 24               | 24               | 24               | 24          |
| 98          | 48          | 52          | 45               | 131              | 168              | 42          |
| 159         | 78          | 113         | 67               | 207              | 318              | 59          |
| 40          | NR          | NR          | NR               | NR               | NR               | NR          |
| 159         | NR          | NR          | NR               | NR               | NR               | NR          |
| 79          | 18          | 21          | 9                | 59               | 111              | 8           |
| 160         | 80          | 110         | 62               | 200              | 318              | 30          |
| 18          | NR          | NR          | NR               | NR               | NR               | NR          |
| 160         | NR          | NR          | NR               | NR               | NR               | NR          |
| L/L/L/L/L/L | L/L/L/L/L/L | L/L/L/L/L/L | L/L/L/L/L/L      | L/L/L/L/L/L      | L/L/L/L/L/L      | L/L/L/L/L/L |

## Trial eligibility criteria and patient baseline characteristics

|           |           |           |           |           |           |           |
|-----------|-----------|-----------|-----------|-----------|-----------|-----------|
| 31        | 30        | 29        | 28        | 27        | 26        | 25        |
| TOC       | ADA       | ETA       | CER       | ADA       | GOL       | GOL       |
| PLA       | PLA       | SSZ       | PLA       | PLA       | PLA       | MTX       |
| DMARD IR  | DMARD IR  | DMARD IR  | DMARD IR  | DMARD IR  | TT IR     | DMARD IR  |
| DIS       | DIS       | NU        | DIS       | DIS       | CON       | NU        |
| DIS       | DIS       | NU        | DIS       | DIS       | CON       | CON       |
| NR        | NU        | NAIVE     | NAIVE     | NAIVE     | NU        | NAIVE     |
| NR        | NR        | ES        | NR        | NR        | NR        | NR        |
| 6         | 10        | 6         | 9         | 10        | 4         | 4         |
| 6         | 12        | 10        | 9         | 12        | 4         | 4         |
| 10 mg/mL< | 20 mg/mL< | 20 mg/mL< | 10 mg/mL< | 20 mg/mL< | NR        | 15 mg/mL< |
| 30        | 28        | 28        | 28        | NR        | NR        | 28        |
| Mix       | Mix       | Mix       | Mix       | Mix       | Mix       | Mix       |
| 78.6      | 81.0      | 80.8      | 83.7      | 78.1      | 79.5      | 81.6      |
| 54.5      | 51.4      | 51.5      | 48.7      | 55.2      | 54.5      | 52.0      |
| 80.7      | 87.5      | 80.7*     | 100.0     | 87.6      | 72.5      | 83.3      |
| NR        | NR        | NR        | NR        | NR        | 72.0      | 80.7      |
| 6.6#      | 7.1       | 6.9#      | 6.3       | 6.6#      | 6.3       | 6.1       |
| 50.0      | 59.5      | 11.6      | 11.5      | 61.8      | 9.0       | 8.8       |
| 68.0      | 52.7      | 38.4      | 33.2      | NR        | NR        | NR        |
| 13.8      | 19.5      | 19.2      | 20.6      | 19.2      | 14.0      | 12.4      |
| 18.0      | 31.0      | 31.3      | 29.0      | 24.1      | 26.5      | 23.0      |
| 8.3       | 9.7       | 6.2       | 9.5       | 9.2       | 9.7       | 5.7       |
| 63.6*     | 65.1      | 63.6*     | 72.0      | 75.2      | 63.0      | 58.6      |
| 63.3*     | 74.6      | 63.3*     | 66.0      | 68.0      | 66.5      | 55.8      |
| 60.2*     | 72.9      | 58.7      | 56.5      | 65.5      | 69.5      | 58.6      |
| 1.5*      | 1.7       | 1.6       | 1.5       | 1.5       | 1.7       | 1.3       |
| 55        | 70        | 104       | 111       | 91        | 153       | 89        |
| 54        | 70        | 52        | 109       | 87        | 155       | 133       |
| 12        | 12        | 24        | 24        | 24        | 14        | 14        |
| 43        | 40        | 74        | 50        | 40        | 54        | 49        |
| 55        | 70        | 100       | 111       | 91        | 153       | 89        |
| NR        | NR        | NR        | NR        | NR        | 13        | 14        |
| NR        | NR        | NR        | NR        | NR        | 153       | 89        |
| 6         | 7         | 14        | 10        | 12        | 28        | 44        |
| 53        | 70        | 50        | 109       | 87        | 155       | 133       |
| NR        | NR        | NR        | NR        | NR        | 1         | 2         |
| NR        | NR        | NR        | NR        | NR        | 155       | 133       |
| L/L/L/L/L | L/L/L/L/L | L/L/L/L/L | L/L/L/L/L | L/L/L/L/L | L/L/L/L/L | L/L/L/L/L |

## Trial eligibility criteria and patient baseline characteristics

|           |           |              |              |              |             |             |             |           |
|-----------|-----------|--------------|--------------|--------------|-------------|-------------|-------------|-----------|
| 38        | CER       | CER          | 37           | 36           | 35          | 34          | 33          | 32        |
| MTX       | MTX       | INF          | MTX          | MTX          | ETA         | GOL         | RIT         | TOC       |
| DMARD IR  | DMARD IR  | DMARD IR     | DMARD IR     | DMARD IR     | DMARD IR    | DMARD IR    | DMARD naive | DMARD IR  |
| NU        | DIS       | NU           | DIS          | DIS          | NU          | NU          | NU          | CON       |
| CON       | CON       | CON          | CON          | CON          | CON         | CON         | NAIVE       | CON       |
| NU        | NU        | NR           | DIS          | DIS          | NAIVE       | NAIVE       | NR          | DIS       |
| ES        | ES        | NR           | NR           | NR           | NR          | NR          | ES          | NR        |
| 9         | 9         | 6            | 10           | 10           | 6           | 6           | 8           | 6         |
| 9         | 9         | 6            | 10           | 10           | 6           | 6           | 8           | 6         |
| 15 mg/mL< | 15 mg/mL< | 20 mg/mL<    | NR           | NR           | 15 mg/mL<   | 15 mg/mL<   | 10 mg/mL<   | 10 mg/mL< |
| 30        | 30        | 28           | NR           | NR           | 28          | 28          | NR          | 28        |
| Mix       | Mix       | Mix          | Mix          | Mix          | Mix         | Mix         | Mix         | Mix       |
| 83.9      | 82.9      | 78.1         | 86.5         | 86.5         | 80.0        | 80.0        | 81.0        | 81.0      |
| 52.0      | 51.7      | 55.2         | 49.2         | 49.2         | 54.5        | 54.5        | 48.0        | 55.4      |
| 77.7      | 80.7      | 80.7*        | 80.7*        | 80.7*        | 80.7*       | 80.7*       | 86.0        | 80.7*     |
| NR        | NR        | NR           | NR           | NR           | NR          | NR          | NR          | NR        |
| 6.8       | 6.9       | 6.0 $\alpha$ | 6.1 $\alpha$ | 6.1 $\alpha$ | 6.4         | 6.4         | 7.1         | 6.5       |
| 14.0      | 16.0      | 41.5         | 15.2         | 15.2         | 20.5        | 20.5        | 31.0        | 18.2      |
| 42.7      | 44.0      | NR           | NR           | NR           | NR          | NR          | NR          | 46.4      |
| 21.0      | 21.5      | 14.3         | 23.0         | 23.0         | 13.5        | 13.5        | 20.8        | 19.8      |
| 30.2      | 30.5      | 18.4         | 21.2         | 21.2         | 25.0        | 25.0        | 32.9        | 29.9      |
| 5.9       | 6.1       | 8.3          | 8.7*         | 8.7*         | 6.9         | 6.9         | 0.4         | 8.6       |
| 64.8      | 63.6*     | 63.6*        | 77.5         | 77.5         | 60.5        | 60.5        | 63.6*       | 62.4      |
| 61.5      | 63.3*     | 63.3*        | 68.0         | 68.0         | 67.5        | 67.5        | 63.3*       | 62.1      |
| 61.2      | 60.2*     | 60.2*        | 56.4         | 56.4         | 70.0        | 70.0        | 60.2*       | 56.3      |
| 1.6       | 1.5*      | 1.5*         | 1.1          | 1.1          | 1.5         | 1.5         | 1.8         | 1.5*      |
| 246       | 393       | 50           | 29           | 29           | 35          | 35          | 251         | 412       |
| 127       | 199       | 50           | 29           | 29           | 35          | 35          | 252         | 207       |
| 24        | 24        | 14           | 12           | 12           | 16          | 16          | 24          | 24        |
| 141       | 228       | 30           | 26           | 26           | 21          | 21          | 183         | 183       |
| 246       | 388       | 49           | 29           | 29           | 35          | 35          | 250         | 409       |
| 23        | NR        | NR           | NR           | NR           | 2           | 2           | NR          | 157       |
| 246       | NR        | NR           | NR           | NR           | 35          | 35          | NR          | 409       |
| 11        | 27        | 11           | 10           | 10           | 13          | 13          | 147         | 52        |
| 127       | 198       | 47           | 29           | 29           | 35          | 35          | 250         | 205       |
| 1         | NR        | NR           | NR           | NR           | 0           | 0           | NR          | 3         |
| 127       | NR        | NR           | NR           | NR           | 35          | 35          | NR          | 205       |
| L/L/L/H/L | L/L/L/L/L | L/L/L/L/L/L  | U/L/U/U/L/L  | U/L/U/U/L/L  | L/L/L/L/U/L | L/L/L/L/U/L | L/L/L/L/L/L | L/L/L/L/L |

## Trial eligibility criteria and patient baseline characteristics

|           |              |              |           |              |           |                  |                  |
|-----------|--------------|--------------|-----------|--------------|-----------|------------------|------------------|
| 45        |              | 44           | 43        | 42           | 41        | 40               | 39               |
| CER       | TOF          | TOF          | GOL       | ABA          | ADA       | INF              |                  |
| MTX       | PLA          | PLA          | PLA       | MTX          | MTX       | MTX              | MTX              |
| DMARD IR  | DMARD IR     | DMARD IR     | DMARD IR  | DMARD naive  | DMARD IR  | DMARD IR         | DMARD IR         |
| DIS       | DIS          | DIS          | DIS       | NU           | DIS       | CON              | CON              |
| CON       | DIS          | DIS          | DIS       | NAIVE        | CON       | CON              | CON              |
| NAIVE     | NU           | DIS          | NR        | NR           | NAIVE     | NAIVE            | NAIVE            |
| NR        | NR           | NR           | NR        | EA           | NR        | NR               | NR               |
| 9         | 6            | 6            | 6         | 10           | 6         | 6                | 6                |
| 9         | 6            | 6            | 6         | 12           | 9         | 6                | 6                |
| 10 mg/mL< | 4.5-7 mg/mL< | 4.5-7 mg/mL< | 20 mg/mL< | 4.5-7 mg/mL< | NR        | NR               | NR               |
| 28        | 28           | 28           | 28        | NR           | NR        | NR               | NR               |
| Mix       | Mix          | Mix          | Mix       | Pos          | Mix       | Mix              | Mix              |
| 69.2      | 88.0         | 85.5         | 81.1      | 77.6         | 78.7      | 81.6             | 81.6             |
| 54.3      | 53.5         | 51.4         | 52.6      | 49.9         | 53.0      | 52.5             | 52.5             |
| 76.1      | 75.9         | 80.7*        | 80.7*     | 96.4         | 87.2      | 81.7             | 81.7             |
| NR        | NR           | NR           | NR        | 89.0         | NR        | NR               | NR               |
| 6.2       | 6.6          | 6.7          | 5.9       | 6.3          | 6.4       | 5.7 <sup>a</sup> | 5.7 <sup>a</sup> |
| 12.5      | 24.0         | 21.2         | 23.6      | 33.5         | 21.0      | 14.0             | 14.0             |
| 25.1      | 46.8         | 52.4         | NR        | NR           | NR        | NR               | NR               |
| 22.5      | 17.1         | 16.6         | 12.9      | 22.4         | 22.5      | 15.0             | 15.0             |
| 30.0      | 26.5         | 29.2         | 15.2      | 31.1         | 33.7      | 22.0             | 22.0             |
| 9.6       | 9.6          | 7.9          | 8.7       | 0.5          | 6.7       | 8.1              | 8.1              |
| 71.0      | 64.3         | 63.6*        | 58.6      | 63.6*        | 81.4      | 62.5             | 62.5             |
| 66.0      | 64.2         | 63.3*        | 54.3      | 63.3*        | 72.0      | 56.5             | 56.5             |
| 58.7      | 62.1         | 60.2*        | 55.4      | 60.2*        | 64.8      | 60.0             | 60.0             |
| 1.4       | 1.5          | 1.5          | 1.0       | 1.7          | 1.7       | 1.5              | 1.5              |
| 126       | 50           | 244          | 102       | 256          | 35        | 360              | 360              |
| 121       | 59           | 122          | 110       | 255          | 12        | 363              | 363              |
| 24        | 12           | 13           | 14        | 12           | 12        | 22               | 22               |
| 56        | 29           | 144          | 51        | 164          | 19        | 199              | 199              |
| 124       | 49           | 241          | 101       | 256          | 35        | 343              | 343              |
| 9         | 6            | 14           | 13        | 41           | NR        | 106              | 106              |
| 97        | 49           | 229          | 97        | 256          | NR        | 343              | 343              |
| 27        | 13           | 32           | 20        | 134          | 4         | 87               | 87               |
| 119       | 59           | 120          | 105       | 253          | 12        | 341              | 341              |
| 2         | 2            | 5            | 2         | 20           | NR        | 48               | 48               |
| 65        | 59           | 104          | 94        | 253          | NR        | 341              | 341              |
| L/L/L/L/L | L/L/L/L/L    | L/L/L/L/L    | L/L/L/L/L | L/L/L/L/L    | U/L/L/L/L | L/L/L/H/L        | L/L/L/H/L        |

## Trial eligibility criteria and patient baseline characteristics

|           |              |           |           |             |           |           |
|-----------|--------------|-----------|-----------|-------------|-----------|-----------|
| 52        | 51           | 50        | 49        | 48          | 47        | 46        |
| GOL       | TOF          | GOL       | ABA       | ADA         | CER       | CER       |
| MTX       | MTX          | MTX       | MTX       | MTX         | MTX       | PLA       |
| DMARD IR  | DMARD IR     | DMARD IR  | DMARD IR  | DMARD naive | DMARD IR  | DMARD IR  |
| NU        | NU           | NR        | DIS       | NU          | NU        | CON       |
| CON       | CON          | CON       | CON       | NAIVE       | CON       | NU        |
| NAIVE     | NU           | NU        | DIS       | NAIVE       | NU        | NU        |
| NR        | NR           | NR        | NR        | EA          | ES        | ES        |
| 6         | 6            | 4         | 10        | 6           | 9         | 6         |
| 6         | 6            | 4         | 12        | 8           | 9         | 6         |
| 10 mg/mL< | 4.5-7 mg/mL< | 15 mg/mL< | 10 mg/mL< | 15 mg/mL<   | 15 mg/mL< | 20 mg/mL< |
| NR        | 28           | 28        | NR        | 28          | 30        | 28        |
| Pos       | Mix          | Mix       | Mix       | Mix         | Mix       | Mix       |
| 81.6      | 82.0         | 83.9      | 79.5      | 74.0        | 84.9      | 74.4      |
| 52.7      | 53.3         | 50.8      | 53.4      | 50.5        | 51.2      | 55.7      |
| 80.7*     | 66.6         | 80.7*     | 80.7*     | 88.0        | 86.2      | 87.4      |
| NR        | 70.7         | NR        | NR        | 84.0        | NR        | NR        |
| 6.0       | 6.6          | 5.6       | 6.0       | 6.0         | 6.3       | 6.2       |
| 19.0      | 15.3         | 20.5      | 33.9      | 28.5        | 15.0      | 16.5      |
| NR        | 48.4         | NR        | NR        | NR          | 46.9      | 50.0      |
| 12.0      | 16.7         | 11.6      | 17.1      | 12.5        | 17.0      | 14.6      |
| 23.3      | 28.1         | 13.2      | 21.7      | 16.0        | 19.3      | 16.9      |
| 4.7       | 7.7          | 8.7       | 7.3       | 4.3         | 5.7       | 5.6       |
| 63.6*     | 63.6*        | 56.2      | 63.6*     | 62.5        | 63.3      | 60.9      |
| 63.3*     | 63.3*        | 48.4      | 65.4      | 63.5        | 55.3      | 56.8      |
| 60.2*     | 60.2*        | 50.9      | 60.2*     | 65.0        | 58.2      | 56.8      |
| 1.6       | 1.5          | 1.0       | 1.4       | 1.6         | 1.1       | 1.1       |
| 395       | 204          | 89        | 62        | 515         | 82        | 116       |
| 197       | 108          | 90        | 66        | 517         | 77        | 114       |
| 14        | 26           | 14        | 24        | 26          | 12        | 12        |
| 231       | 101          | 62        | 47        | 361         | 63        | 78        |
| 395       | 196          | 86        | 61        | 515         | 82        | 116       |
| NR        | 11           | 27        | 15        | 175         | 13        | 19        |
| NR        | 177          | 86        | 61        | 515         | 82        | 116       |
| 49        | 30           | 24        | 14        | 295         | 22        | 17        |
| 197       | 106          | 88        | 66        | 517         | 77        | 114       |
| NR        | 1            | 3         | 1         | 88          | 0         | 1         |
| NR        | 92           | 88        | 66        | 517         | 77        | 114       |
| L/L/L/L/L | L/L/L/L/L    | L/L/L/L/L | L/L/L/L/L | L/L/L/L/L   | L/L/L/L/L | L/L/L/L/L |



## Trial eligibility criteria and patient baseline characteristics

|              |              |              |              |             |                  |                  |              |           |
|--------------|--------------|--------------|--------------|-------------|------------------|------------------|--------------|-----------|
| 59           | TOF          | TOF          | TOF          | TOF         | INF              | ADA              | TOF          | 53        |
| MTX          | MTX          | MTX          | MTX          | MTX         | DMARD naive      | MTX              | MTX          | CER       |
| DMARD IR     | TT IR        | DMARD IR     | DMARD IR     | DMARD IR    | DMARD IR         | DMARD IR         | DMARD IR     | PLA       |
| DIS          | DIS          | NU           | NU           | NU          | DIS              | DIS              | DIS          | DMARD IR  |
| CON          | CON          | CON          | CON          | NAIVE       | CON              | CON              | CON          | CON       |
| DIS          | DIS          | NU           | NU           | NR          | NR               | NR               | DIS          | NU        |
| NR           | NR           | NR           | NR           | EA          | NR               | NR               | NR           | NR        |
| 6            | 6            | 6            | 6            | 6           | 6                | 6                | 6            | 6         |
| 6            | 6            | 6            | 6            | 8           | 9                | 9                | 6            | 8         |
| 4.5-7 mg/mL< | 4.5-7 mg/mL< | 4.5-7 mg/mL< | 4.5-7 mg/mL< | NR          | NR               | NR               | 4.5-7 mg/mL< | 10 mg/mL< |
| 28           | 28           | 28           | 28           | NR          | NR               | NR               | 28           | 28        |
| Mix          | Mix          | Mix          | Mix          | Mix         | Mix              | Mix              | Mix          | Mix       |
| 80.7         | 82.7         | 84.4         | 84.4         | 68.9        | 90.6             | 90.6             | 85.4         | 78.0      |
| 52.5         | 54.9         | 53.4         | 53.4         | 51.8        | 49.1             | 49.1             | 50.3         | 55.1      |
| 82.9         | 63.1         | 76.0         | 76.0         | 65.6        | 79.7             | 79.7             | 85.5         | 74.4      |
| NR           | 72.1         | 85.0         | 85.0         | 58.0        | NR               | NR               | NR           | 66.3      |
| 6.1          | 6.5          | 6.3          | 6.3          | 5.3         | 5.0 <sup>a</sup> | 5.0 <sup>a</sup> | 6.0          | 6.4       |
| 18.4         | 18.0         | 14.9         | 14.9         | 36.9        | 2.4              | 2.4              | 19.5         | 9.2       |
| NR           | 47.3         | 50.4         | 50.4         | NR          | NR               | NR               | NR           | 37.6      |
| 14.9         | 16.7         | 14.1         | 14.1         | 11.4        | 12.5             | 12.5             | 14.7         | 17.0      |
| 21.5         | 28.3         | 23.7         | 23.7         | 13.8        | 19.7             | 19.7             | 17.1         | 23.1      |
| 9.1          | 12.2         | 9.0          | 9.0          | 0.4         | 6.8              | 6.8              | 8.4          | 5.6       |
| 53.3         | 64.9         | 58.2         | 58.2         | 63.6*       | 63.8             | 63.8             | 59.4         | 63.6*     |
| 57.4         | 63.3         | 56.8         | 56.8         | 63.3*       | 61.4             | 61.4             | 56.1         | 63.3*     |
| 53.1         | 63.2         | 57.3         | 57.3         | 60.2*       | 58.5             | 58.5             | 53.3         | 60.2*     |
| 1.3          | 1.6          | 1.4          | 1.4          | 1.4         | 1.4              | 1.4              | 1.3          | 1.5       |
| 71           | 133          | 321          | 321          | 15          | 65               | 65               | 28           | 851       |
| 69           | 132          | 160          | 160          | 14          | 63               | 63               | 28           | 212       |
| 12           | 13           | 26           | 26           | 22          | 24               | 24               | 12           | 12        |
| 40           | 55           | 159          | 159          | 13          | 40               | 40               | 26           | 435       |
| 71           | 132          | 309          | 309          | 15          | 65               | 65               | 27           | 851       |
| 10           | 8            | 19           | 19           | NR          | NR               | NR               | NR           | 136       |
| 60           | 119          | 265          | 265          | NR          | NR               | NR               | NR           | 851       |
| 25           | 32           | 39           | 39           | 4           | 23               | 23               | 4            | 55        |
| 69           | 131          | 154          | 154          | 14          | 63               | 63               | 28           | 212       |
| 4            | 2            | 2            | 2            | NR          | NR               | NR               | NR           | 12        |
| 60           | 120          | 129          | 129          | NR          | NR               | NR               | NR           | 212       |
| L/L/L/L/L    | L/L/L/L/L    | L/L/L/L/H/L  | L/L/L/L/H/L  | L/L/H/H/H/L | L/L/L/L/L        | L/L/L/L/L        | L/L/L/L/L    | L/L/L/L/L |

Trial eligibility criteria and patient baseline characteristics

|    |     |     |             |     |       |       |    |   |    |              |    |     |      |      |       |      |                  |      |      |       |       |     |       |       |       |      |     |     |    |     |     |    |     |    |     |    |     |             |             |
|----|-----|-----|-------------|-----|-------|-------|----|---|----|--------------|----|-----|------|------|-------|------|------------------|------|------|-------|-------|-----|-------|-------|-------|------|-----|-----|----|-----|-----|----|-----|----|-----|----|-----|-------------|-------------|
| 62 | INF | MTX | DMARD IR    | NU  | CON   | NR    | NR | 3 | 8  | NR           | 28 | Mix | 85.0 | 48.4 | 80.7* | NR   | 6.4 <sup>‡</sup> | 24*  | NR   | 19.2* | 28.3* | 7.5 | 63.6* | 63.3* | 60.2* | 1.5* | 87  | 86  | 18 | 66  | 87  | NR | NR  | 42 | 86  | NR | NR  | NR          | L/L/L/L/U/L |
| 60 | ADA | MTX | DMARD naive | DIS | NAIVE | NAIVE | EA | 8 | 10 | 15 mg/mL<    | 28 | Mix | 81.4 | 54.0 | 84.4  | 84.1 | 6.6              | 30.0 | 60.8 | 16.9  | 13.2  | 0.3 | 66.0  | 65.2  | 60.2* | 1.2  | 171 | 163 | 26 | 129 | 171 | 53 | 171 | 92 | 163 | 24 | 163 | L/L/L/L/L/L |             |
| 61 | TOF | PLA | DMARD IR    | CON | CON   | NU    | NR | 4 | 4  | 4.5-7 mg/mL< | 28 | Mix | 81.7 | 52.5 | 73.5  | 69.2 | 6.3              | 17.4 | 50.4 | 14.4  | 24.8  | 8.7 | 59.9  | 58.7  | 57.1  | 1.4  | 318 | 159 | 26 | 164 | 315 | 24 | 284 | 49 | 159 | 4  | 153 | L/L/L/L/L/L |             |

ABA, abatacept; ACR20, American College of Rheumatology 20% improvement criteria; ADA, adalimumab; Anti-CCP, anti-cyclic citrullinated peptide; BL, baseline; CER, certolizumab; CON, continued; DAS28, disease activity score in 28 joints; DIS, Discontinued; csDMARD, conventional synthetic disease modifying antirheumatic drugs; ETA, etanercept; GOL, golimumab; HAQ, health assessment questionnaire; INF, infliximab; IR, inadequate responders; MD global, physicians global assessment (0-100); Min, minimum; MTX, methotrexate; NR, Not reported; NU, Not using; OR, odds ratio; PLA, placebo; PT global, patient global assessment; RIT, rituximab; RF, rheumatoid factor; SJC, swollen joint count; TJC, tender joint count; TOC, tocilizumab; TOF, tofacitinib; TT, Targeted therapy; VAS, visual analogue scale (0-100).

\*Median values for the dataset imputed

# Calculated from DAS28-ESR(4) formula:  $0.56 \cdot \sqrt{TJC28} + 0.28 \cdot \sqrt{SJC28} + 0.70 \cdot \ln(ESR) + 0.014 \cdot GH$

‡ Calculated from DAS28-CRP(4) formula:  $0.56 \cdot \sqrt{TJC28} + 0.28 \cdot \sqrt{SJC28} + 0.36 \cdot \ln(CRP+1) + 0.014 \cdot GH + 0.96$

§Risk of bias rated as L, low; U, unclear; H, high per domain: Allocation concealment/ Blinding of participants and personnel/ Blinding of outcome assessment/ Incomplete outcome data/ Selective reporting

Reference List

## Trial eligibility criteria and patient baseline characteristics

- (1) Genovese MC, Becker JC, Schiff M, Luggen M, Sherrer Y, Kremer J, et al. Abatacept for rheumatoid arthritis refractory to tumor necrosis factor alpha inhibition. *N Engl J Med* 2005 Sep 15;353(11):1114-23.
- (2) Moreland LW, Alten R, Van den Bosch F, Appelboom T, Leon M, Emery P, et al. Costimulatory blockade in patients with rheumatoid arthritis: a pilot, dose-finding, double-blind, placebo-controlled clinical trial evaluating CTLA-4Ig and LEA29Y eighty-five days after the first infusion. *Arthritis Rheum* 2002 Jun;46(6):1470-9.
- (3) Kremer JM, Genant HK, Moreland LW, Russell AS, Emery P, Abud-Mendoza C, et al. Effects of abatacept in patients with methotrexate-resistant active rheumatoid arthritis: a randomized trial. *Ann Intern Med* 2006 Jun 20;144(12):865-76.
- (4) Maini RN, Taylor PC, Szechinski J, Pavelka K, Broll J, Balint G, et al. Double-blind randomized controlled clinical trial of the interleukin-6 receptor antagonist, tocilizumab, in European patients with rheumatoid arthritis who had an incomplete response to methotrexate. *Arthritis Rheum* 2006 Sep;54(9):2817-29.
- (5) Kremer JM, Blanco R, Brzosko M, Burgos-Vargas R, Halland AM, Vernon E, et al. Tocilizumab inhibits structural joint damage in rheumatoid arthritis patients with inadequate responses to methotrexate: results from the double-blind treatment phase of a randomized placebo-controlled trial of tocilizumab safety and prevention of structural joint damage at one year. *Arthritis Rheum* 2011 Mar;63(3):609-21.
- (6) Genovese MC, McKay JD, Nasonov EL, Mysler EF, da Silva NA, Alecock E, et al. Interleukin-6 receptor inhibition with tocilizumab reduces disease activity in rheumatoid arthritis with inadequate response to disease-modifying antirheumatic drugs: the tocilizumab in combination with traditional disease-modifying antirheumatic drug therapy study. *Arthritis Rheum* 2008 Oct;58(10):2968-80.
- (7) Smolen JS, Beaulieu A, Rubbert-Roth A, Ramos-Remus C, Rovensky J, Alecock E, et al. Effect of interleukin-6 receptor inhibition with tocilizumab in patients with rheumatoid arthritis (OPTION study): a double-blind, placebo-controlled, randomised trial. *Lancet* 2008 Mar 22;371(9617):987-97.
- (8) Schiff M, Keiserman M, Coddling C, Songcharoen S, Berman A, Nayiager S, et al. Efficacy and safety of abatacept or infliximab vs placebo in ATTEST: a phase III, multi-centre, randomised, double-blind, placebo-controlled study in patients with rheumatoid arthritis and an inadequate response to methotrexate. *Ann Rheum Dis* 2008 Aug;67(8):1096-103.
- (9) Kremer JM, Westhovens R, Leon M, Di GE, Alten R, Steinfeld S, et al. Treatment of rheumatoid arthritis by selective inhibition of T-cell activation with fusion protein CTLA4Ig. *N Engl J Med* 2003 Nov 13;349(20):1907-15.

## Trial eligibility criteria and patient baseline characteristics

- (10) Emery P, Keystone E, Tony HP, Cantagrel A, van VR, Sanchez A, et al. IL-6 receptor inhibition with tocilizumab improves treatment outcomes in patients with rheumatoid arthritis refractory to anti-tumour necrosis factor biologicals: results from a 24-week multicentre randomised placebo-controlled trial. *Ann Rheum Dis* 2008 Nov;67(11):1516-23.
- (11) Maini R, St Clair EW, Breedveld F, Furst D, Kalden J, Weisman M, et al. Infliximab (chimeric anti-tumour necrosis factor alpha monoclonal antibody) versus placebo in rheumatoid arthritis patients receiving concomitant methotrexate: a randomised phase III trial. ATTRACT Study Group. *Lancet* 1999 Dec 4;354(9194):1932-9.
- (12) Quinn MA, Conaghan PG, O'Connor PJ, Karim Z, Greenstein A, Brown A, et al. Very early treatment with infliximab in addition to methotrexate in early, poor-prognosis rheumatoid arthritis reduces magnetic resonance imaging evidence of synovitis and damage, with sustained benefit after infliximab withdrawal: results from a twelve-month randomized, double-blind, placebo-controlled trial. *Arthritis Rheum* 2005 Jan;52(1):27-35.
- (13) Cohen SB, Emery P, Greenwald MW, Dougados M, Furie RA, Genovese MC, et al. Rituximab for rheumatoid arthritis refractory to anti-tumor necrosis factor therapy: Results of a multicenter, randomized, double-blind, placebo-controlled, phase III trial evaluating primary efficacy and safety at twenty-four weeks. *Arthritis Rheum* 2006 Sep;54(9):2793-806.
- (14) Emery P, Deodhar A, Rigby WF, Isaacs JD, Combe B, Racewicz AJ, et al. Efficacy and safety of different doses and retreatment of rituximab: a randomised, placebo-controlled trial in patients who are biological naive with active rheumatoid arthritis and an inadequate response to methotrexate (Study Evaluating Rituximab's Efficacy in MTX iNadequate rEsponders (SERENE)). *Ann Rheum Dis* 2010 Sep;69(9):1629-35.
- (15) Edwards JC, Szczepanski L, Szechinski J, Filipowicz-Sosnowska A, Emery P, Close DR, et al. Efficacy of B-cell-targeted therapy with rituximab in patients with rheumatoid arthritis. *N Engl J Med* 2004 Jun 17;350(25):2572-81.
- (16) Emery P, Fleischmann R, Filipowicz-Sosnowska A, Schechtman J, Szczepanski L, Kavanaugh A, et al. The efficacy and safety of rituximab in patients with active rheumatoid arthritis despite methotrexate treatment: results of a phase IIB randomized, double-blind, placebo-controlled, dose-ranging trial. *Arthritis Rheum* 2006 May;54(5):1390-400.
- (17) Klareskog L, van der Heijde D, de Jager JP, Gough A, Kalden J, Malaise M, et al. Therapeutic effect of the combination of etanercept and methotrexate compared with each treatment alone in patients with rheumatoid arthritis: double-blind randomised controlled trial. *Lancet* 2004 Feb 28;363(9410):675-81.

## Trial eligibility criteria and patient baseline characteristics

- (18) Weinblatt ME, Kremer JM, Bankhurst AD, Bulpitt KJ, Fleischmann RM, Fox RI, et al. A trial of etanercept, a recombinant tumor necrosis factor receptor:Fc fusion protein, in patients with rheumatoid arthritis receiving methotrexate. *N Engl J Med* 1999 Jan 28;340(4):253-9.
- (19) Furst DE, Schiff MH, Fleischmann RM, Strand V, Birbara CA, Compagnone D, et al. Adalimumab, a fully human anti tumor necrosis factor-alpha monoclonal antibody, and concomitant standard antirheumatic therapy for the treatment of rheumatoid arthritis: results of STAR (Safety Trial of Adalimumab in Rheumatoid Arthritis). *J Rheumatol* 2003 Dec;30(12):2563-71.
- (20) Keystone EC, Kavanaugh AF, Sharp JT, Tannenbaum H, Hua Y, Teoh LS, et al. Radiographic, clinical, and functional outcomes of treatment with adalimumab (a human anti-tumor necrosis factor monoclonal antibody) in patients with active rheumatoid arthritis receiving concomitant methotrexate therapy: a randomized, placebo-controlled, 52-week trial. *Arthritis Rheum* 2004 May;50(5):1400-11.
- (21) Weinblatt ME, Keystone EC, Furst DE, Moreland LW, Weisman MH, Birbara CA, et al. Adalimumab, a fully human anti-tumor necrosis factor alpha monoclonal antibody, for the treatment of rheumatoid arthritis in patients taking concomitant methotrexate: the ARMADA trial. *Arthritis Rheum* 2003 Jan;48(1):35-45.
- (22) van de Putte LB, Atkins C, Malaise M, Sany J, Russell AS, Van Riel PL, et al. Efficacy and safety of adalimumab as monotherapy in patients with rheumatoid arthritis for whom previous disease modifying antirheumatic drug treatment has failed. *Ann Rheum Dis* 2004 May;63(5):508-16.
- (23) Moreland LW, Schiff MH, Baumgartner SW, Tindall EA, Fleischmann RM, Bulpitt KJ, et al. Etanercept therapy in rheumatoid arthritis. A randomized, controlled trial. *Ann Intern Med* 1999 Mar 16;130(6):478-86.
- (24) Emery P, Fleischmann RM, Moreland LW, Hsia EC, Strusberg I, Durez P, et al. Golimumab, a human anti-tumor necrosis factor alpha monoclonal antibody, injected subcutaneously every four weeks in methotrexate-naive patients with active rheumatoid arthritis: twenty-four-week results of a phase III, multicenter, randomized, double-blind, placebo-controlled study of golimumab before methotrexate as first-line therapy for early-onset rheumatoid arthritis. *Arthritis Rheum* 2009 Aug;60(8):2272-83.
- (25) Keystone EC, Genovese MC, Klareskog L, Hsia EC, Hall ST, Miranda PC, et al. Golimumab, a human antibody to tumour necrosis factor {alpha} given by monthly subcutaneous injections, in active rheumatoid arthritis despite methotrexate therapy: the GO-FORWARD Study. *Ann Rheum Dis* 2009 Jun;68(6):789-96.

## Trial eligibility criteria and patient baseline characteristics

- (26) Smolen JS, Kay J, Doyle MK, Landewe R, Matteson EL, Wollenhaupt J, et al. Golimumab in patients with active rheumatoid arthritis after treatment with tumour necrosis factor alpha inhibitors (GO-AFTER study): a multicentre, randomised, double-blind, placebo-controlled, phase III trial. *Lancet* 2009 Jul 18;374(9685):210-21.
- (27) Miyasaka N. Clinical investigation in highly disease-affected rheumatoid arthritis patients in Japan with adalimumab applying standard and general evaluation: the CHANGE study. *Mod Rheumatol* 2008;18(3):252-62.
- (28) Fleischmann R, Vencovsky J, van Vollenhoven RF, Borenstein D, Box J, Coteur G, et al. Efficacy and safety of certolizumab pegol monotherapy every 4 weeks in patients with rheumatoid arthritis failing previous disease-modifying antirheumatic therapy: the FAST4WARD study. *Ann Rheum Dis* 2009 Jun;68(6):805-11.
- (29) Combe B, Codreanu C, Fiocco U, Gaubitz M, Geusens PP, Kvien TK, et al. Etanercept and sulfasalazine, alone and combined, in patients with active rheumatoid arthritis despite receiving sulfasalazine: a double-blind comparison. *Ann Rheum Dis* 2006 Oct;65(10):1357-62.
- (30) van de Putte LB, Rau R, Breedveld FC, Kalden JR, Malaise MG, Van Riel PL, et al. Efficacy and safety of the fully human anti-tumour necrosis factor alpha monoclonal antibody adalimumab (D2E7) in DMARD refractory patients with rheumatoid arthritis: a 12 week, phase II study. *Ann Rheum Dis* 2003 Dec;62(12):1168-77.
- (31) Nishimoto N, Yoshizaki K, Miyasaka N, Yamamoto K, Kawai S, Takeuchi T, et al. Treatment of rheumatoid arthritis with humanized anti-interleukin-6 receptor antibody: a multicenter, double-blind, placebo-controlled trial. *Arthritis Rheum* 2004 Jun;50(6):1761-9.
- (32) Yazici Y, Curtis JR, Ince A, Baraf H, Malamet RL, Teng LL, et al. Efficacy of tocilizumab in patients with moderate to severe active rheumatoid arthritis and a previous inadequate response to disease-modifying antirheumatic drugs: the ROSE study. *Ann Rheum Dis* 2012 Feb;71(2):198-205.
- (33) Tak PP, Rigby WF, Rubbert-Roth A, Peterfy CG, van Vollenhoven RF, Stohl W, et al. Inhibition of joint damage and improved clinical outcomes with rituximab plus methotrexate in early active rheumatoid arthritis: the IMAGE trial. *Ann Rheum Dis* 2011 Jan;70(1):39-46.
- (34) Kay J, Matteson EL, Dasgupta B, Nash P, Durez P, Hall S, et al. Golimumab in patients with active rheumatoid arthritis despite treatment with methotrexate: a randomized, double-blind, placebo-controlled, dose-ranging study. *Arthritis Rheum* 2008 Apr;58(4):964-75.
- (35) Lan JL, Chou SJ, Chen DY, Chen YH, Hsieh TY, Young M, Jr. A comparative study of etanercept plus methotrexate and methotrexate alone in Taiwanese patients with active rheumatoid arthritis: a 12-week, double-blind, randomized, placebo-controlled study. *J Formos Med Assoc* 2004 Aug;103(8):618-23.

## Trial eligibility criteria and patient baseline characteristics

- (36) Abe T, Takeuchi T, Miyasaka N, Hashimoto H, Kondo H, Ichikawa Y, et al. A multicenter, double-blind, randomized, placebo controlled trial of infliximab combined with low dose methotrexate in Japanese patients with rheumatoid arthritis. *J Rheumatol* 2006 Jan;33(1):37-44.
- (37) Keystone E, Heijde D, Mason D, Jr., Landewe R, Vollenhoven RV, Combe B, et al. Certolizumab pegol plus methotrexate is significantly more effective than placebo plus methotrexate in active rheumatoid arthritis: findings of a fifty-two-week, phase III, multicenter, randomized, double-blind, placebo-controlled, parallel-group study. *Arthritis Rheum* 2008 Nov;58(11):3319-29.
- (38) Smolen J, Landewe RB, Mease P, Brzezicki J, Mason D, Luijtens K, et al. Efficacy and safety of certolizumab pegol plus methotrexate in active rheumatoid arthritis: the RAPID 2 study. A randomised controlled trial. *Ann Rheum Dis* 2009 Jun;68(6):797-804.
- (39) Westhovens R, Yocum D, Han J, Berman A, Strusberg I, Geusens P, et al. The safety of infliximab, combined with background treatments, among patients with rheumatoid arthritis and various comorbidities: a large, randomized, placebo-controlled trial. *Arthritis Rheum* 2006 Apr;54(4):1075-86.
- (40) Chen DY, Chou SJ, Hsieh TY, Chen YH, Chen HH, Hsieh CW, et al. Randomized, double-blind, placebo-controlled, comparative study of human anti-TNF antibody adalimumab in combination with methotrexate and methotrexate alone in Taiwanese patients with active rheumatoid arthritis. *J Formos Med Assoc* 2009 Apr;108(4):310-9.
- (41) Westhovens R, Robles M, Ximenes AC, Nayiager S, Wollenhaupt J, Durez P, et al. Clinical efficacy and safety of abatacept in methotrexate-naive patients with early rheumatoid arthritis and poor prognostic factors. *Ann Rheum Dis* 2009 Dec;68(12):1870-7.
- (42) Takeuchi T, Harigai M, Tanaka Y, Yamanaka H, Ishiguro N, Yamamoto K, et al. Golimumab monotherapy in Japanese patients with active rheumatoid arthritis despite prior treatment with disease-modifying antirheumatic drugs: results of the phase 2/3, multicentre, randomised, double-blind, placebo-controlled GO-MONO study through 24 weeks. *Ann Rheum Dis* 2013 Sep 1;72(9):1488-95.
- (43) Fleischmann R, Kremer J, Cush J, Schulze-Koops H, Connell CA, Bradley JD, et al. Placebo-controlled trial of tofacitinib monotherapy in rheumatoid arthritis. *N Engl J Med* 2012 Aug 9;367(6):495-507.
- (44) Fleischmann R, Cutolo M, Genovese MC, Lee EB, Kanik KS, Sadis S, et al. Phase IIb dose-ranging study of the oral JAK inhibitor tofacitinib (CP-690,550) or adalimumab monotherapy versus placebo in patients with active rheumatoid arthritis with an inadequate response to disease-modifying antirheumatic drugs. *Arthritis Rheum* 2012 Mar;64(3):617-29.

## Trial eligibility criteria and patient baseline characteristics

- (45) Choy E, McKenna F, Vencovsky J, Valente R, Goel N, Vanlunen B, et al. Certolizumab pegol plus MTX administered every 4 weeks is effective in patients with RA who are partial responders to MTX. *Rheumatology (Oxford)* 2012 Jul;51(7):1226-34.
- (46) Yamamoto K, Takeuchi T, Yamanaka H, Ishiguro N, Tanaka Y, Eguchi K, et al. Efficacy and safety of certolizumab pegol without methotrexate co-administration in Japanese patients with active rheumatoid arthritis: the HIKARI randomized, placebo-controlled trial. *Mod Rheumatol* 2014 Jul;24(4):552-60.
- (47) Yamamoto K, Takeuchi T, Yamanaka H, Ishiguro N, Tanaka Y, Eguchi K, et al. Efficacy and safety of certolizumab pegol plus methotrexate in Japanese rheumatoid arthritis patients with an inadequate response to methotrexate: the J-RAPID randomized, placebo-controlled trial. *Mod Rheumatol* 2014 Sep;24(5):715-24.
- (48) Kavanaugh A, Fleischmann RM, Emery P, Kupper H, Redden L, Guerette B, et al. Clinical, functional and radiographic consequences of achieving stable low disease activity and remission with adalimumab plus methotrexate or methotrexate alone in early rheumatoid arthritis: 26-week results from the randomised, controlled OPTIMA study. *Ann Rheum Dis* 2013 Jan;72(1):64-71.
- (49) Takeuchi T, Matsubara T, Nitobe T, Suematsu E, Ohta S, Honjo S, et al. Phase II dose-response study of abatacept in Japanese patients with active rheumatoid arthritis with an inadequate response to methotrexate. *Mod Rheumatol* 2013 Mar;23(2):226-35.
- (50) Tanaka Y, Harigai M, Takeuchi T, Yamanaka H, Ishiguro N, Yamamoto K, et al. Golimumab in combination with methotrexate in Japanese patients with active rheumatoid arthritis: results of the GO-FORTH study. *Ann Rheum Dis* 2012 Jun;71(6):817-24.
- (51) van Vollenhoven RF, Fleischmann R, Cohen S, Lee EB, Garcia Meijide JA, Wagner S, et al. Tofacitinib or adalimumab versus placebo in rheumatoid arthritis. *N Engl J Med* 2012 Aug 9;367(6):508-19.
- (52) Weinblatt ME, Bingham CO, III, Mendelsohn AM, Kim L, Mack M, Lu J, et al. Intravenous golimumab is effective in patients with active rheumatoid arthritis despite methotrexate therapy with responses as early as week 2: results of the phase 3, randomised, multicentre, double-blind, placebo-controlled GO-FURTHER trial. *Ann Rheum Dis* 2013 Mar;72(3):381-9.
- (53) Weinblatt ME, Fleischmann R, Huizinga TW, Emery P, Pope J, Massarotti EM, et al. Efficacy and safety of certolizumab pegol in a broad population of patients with active rheumatoid arthritis: results from the REALISTIC phase IIIb study. *Rheumatology (Oxford)* 2012 Dec;51(12):2204-14.



## Trial eligibility criteria and patient baseline characteristics

- (54) Tanaka Y, Suzuki M, Nakamura H, Toyozumi S, Zwillich SH. Phase II study of tofacitinib (CP-690,550) combined with methotrexate in patients with rheumatoid arthritis and an inadequate response to methotrexate. *Arthritis Care Res (Hoboken)* 2011 Aug;63(8):1150-8.
- (55) Kim H-Y, Lee S-K, Song YW, Yoo D-H, Koh E-M, Yoo B, et al. A randomized, double-blind, placebo-controlled, phase III study of the human anti-tumor necrosis factor antibody adalimumab administered as subcutaneous injections in Korean rheumatoid arthritis patients treated with methotrexate. *APLAR Journal of Rheumatology* 2007;10(1):April.
- (56) Durez P, Malghem J, Nzeusseu TA, Depresseux G, Lauwerys BR, Westhovens R, et al. Treatment of early rheumatoid arthritis: a randomized magnetic resonance imaging study comparing the effects of methotrexate alone, methotrexate in combination with infliximab, and methotrexate in combination with intravenous pulse methylprednisolone. *Arthritis Rheum* 2007 Dec;56(12):3919-27.
- (57) van der Heijde D, Tanaka Y, Fleischmann R, Keystone E, Kremer J, Zerbini C, et al. Tofacitinib (CP-690,550) in patients with rheumatoid arthritis receiving methotrexate: twelve-month data from a twenty-four-month phase III randomized radiographic study. *Arthritis Rheum* 2013 Mar;65(3):559-70.
- (58) Burmester GR, Blanco R, Charles-Schoeman C, Wollenhaupt J, Zerbini C, Benda B, et al. Tofacitinib (CP-690,550) in combination with methotrexate in patients with active rheumatoid arthritis with an inadequate response to tumour necrosis factor inhibitors: a randomised phase 3 trial. *Lancet* 2013 Feb 9;381(9865):451-60.
- (59) Kremer JM, Cohen S, Wilkinson BE, Connell CA, French JL, Gomez-Reino J, et al. A phase IIb dose-ranging study of the oral JAK inhibitor tofacitinib (CP-690,550) versus placebo in combination with background methotrexate in patients with active rheumatoid arthritis and an inadequate response to methotrexate alone. *Arthritis Rheum* 2012 Apr;64(4):970-81.
- (60) Takeuchi T, Yamanaka H, Ishiguro N, Miyasaka N, Mukai M, Matsubara T, et al. Adalimumab, a human anti-TNF monoclonal antibody, outcome study for the prevention of joint damage in Japanese patients with early rheumatoid arthritis: the HOPEFUL 1 study. *Ann Rheum Dis* 2014 Mar;73(3):536-43.
- (61) Kremer J, Li ZG, Hall S, Fleischmann R, Genovese M, Martin-Mola E, et al. Tofacitinib in combination with nonbiologic disease-modifying antirheumatic drugs in patients with active rheumatoid arthritis: a randomized trial. *Ann Intern Med* 2013 Aug 20;159(4):253-61.
- (62) Zhang F-C, Hou Y, Huang F, Wu D-H, Bao C-D, Ni L-Q, et al. Infliximab versus placebo in rheumatoid arthritis patients receiving concomitant methotrexate: A preliminary study from China. *APLAR Journal of Rheumatology* 2006;9(2):August.
